# Supplementary material for: Self-assembly of modified rhodamine-6G with tri-block copolymer: unusual vesicle formation, pH sensing and dye release properties
Source: Royal Society of Chemistry journal article supplement (doi:10.1039/c2tb00193d), 2012-12-19
Supplement: c2tb00193d.pdf [file c2tb00193d.pdf]

## Supporting Information

### Self-assembly of modified Rhodamine-6G with tri-block copolymer: Unusual vesicles formation, pH sensing and dye release properties

L. Praveen, Sukdeb Saha, Suresh K. Jewrajka\*, Amitava Das\*

*Central Salt & Marine Chemicals Research Institute (CSIR),  
Bhavnagar, 364002, Gujarat, India  
Fax: (+91) 278-2567562  
E-mail: [amitava@csmcri.org](mailto:amitava@csmcri.org); [skjewrajka@csmcri.org](mailto:skjewrajka@csmcri.org)*

#### Contents

|    |                                                                                      |            |
|----|--------------------------------------------------------------------------------------|------------|
| 1  | Synthesis of rhodamine-6G derivatives                                                | <i>S1</i>  |
| 2  | <sup>1</sup> H NMR spectrum of octadecyl rhodamine-6G                                | <i>S2</i>  |
| 3  | <sup>13</sup> C NMR spectrum octadecyl rhodamine-6G                                  | <i>S3</i>  |
| 4  | ESI-Mass spectrum of octadecyl rhodamine-6G                                          | <i>S4</i>  |
| 5  | <sup>1</sup> H NMR spectrum of propyl rhodamine-6G                                   | <i>S5</i>  |
| 6  | <sup>13</sup> C NMR propyl rhodamine-6G spectrum                                     | <i>S6</i>  |
| 7  | ESI-Mass spectrum of propyl rhodamine-6G                                             | <i>S7</i>  |
| 8  | DLS of PDMA-b-PMMA-b-PDMA polymer in water-ethanol solvent system at a pH 7 and pH 5 | <i>S8</i>  |
| 9  | Average hydrodynamic diameter of vesicles at different pH                            | <i>S9</i>  |
| 10 | SEM picture of vesicles upon exposure to different pH                                | <i>S10</i> |
| 11 | Emission spectra of pyrene (2 x 10 <sup>-6</sup> M) in the vesicle after dialysis    | <i>S11</i> |

|    |                                                                                                                                                                                                                     |            |
|----|---------------------------------------------------------------------------------------------------------------------------------------------------------------------------------------------------------------------|------------|
| 12 | UV-Vis response of octadecyl rhodamine-6G ( $8 \times 10^{-5}$ M) in aqueous media (ethanol-water, 1:4, v/v) at a pH 6                                                                                              | <b>S12</b> |
| 13 | UV-Vis response of vesicle in aqueous media (ethanol-water, 1:4, v/v) at a pH 6                                                                                                                                     | <b>S13</b> |
| 14 | UV-Vis spectra of propyl rhodamine-6G ( $5 \times 10^{-4}$ M) in ethanol upon addition of HCl                                                                                                                       | <b>S14</b> |
| 15 | Emission spectra of the vesicle in aqueous media at a pH 6 for 40 h                                                                                                                                                 | <b>S15</b> |
| 16 | Emission response of the octadecyl rhodamine-6G in aqueous media (ethanol-water, 1:4, v/v) at a pH 6 for a period 3h                                                                                                | <b>S16</b> |
| 17 | Plot of $I/I_{\max}$ of propyl rhodamine -6G in different pH                                                                                                                                                        | <b>S17</b> |
| 18 | AFM image of octadecyl rhodamine-6G ( $5 \times 10^{-5}$ M) in aqueous media (ethanol-water, 1:4, v/v)                                                                                                              | <b>S18</b> |
| 19 | AFM image of the propyl rhodamine-6G in aqueous media (ethanol-water, 1:4, v/v)                                                                                                                                     | <b>S19</b> |
| 20 | AFM image of the PDMA-b-PMMA-b-PDMA polymer (0.4g/L) with propyl rhodamine-6G ( $5 \times 10^{-5}$ M) in water-ethanol (4:1, v/v) solvent system                                                                    | <b>S20</b> |
| 21 | DLS result of PDMA-b-PMMA-b-PDMA polymer (0.4 g/L) with rhodamine-6G (0.12 g/L) in water-ethanol (4:1, v/v) solvent system.                                                                                         | <b>S21</b> |
| 22 | Standard curve for the calculation of octadecyl rhodamine-6G loading in the vesicle                                                                                                                                 | <b>S22</b> |
| 23 | Standard curve for the dye release experiment                                                                                                                                                                       | <b>S23</b> |
| 24 | Plot for the release of total ring opened octadecyl rhodamine-6G released from the vesicle after dialysis in suitable pH, followed by the addition of 2N HCl for 30 min. in water-ethanol (4:1, v/v) solvent system | <b>S24</b> |
| 25 | AFM image of the PDMA-b-PMMA-b-PDMA polymer (0.4g/L) with octadecyl rhodamine-6G (0.12 g/L) in water-ethanol (4:1, v/v) solvent system when drop casted over mica substrate                                         | <b>S25</b> |
| 26 | DLS result of PDMA-b-PMMA-b-PDMA polymer with octadecyl rhodamine-6G in water-ethanol solvent system at a pH = 3                                                                                                    | <b>S26</b> |
| 27 | DLS result of PDMA-b-PMMA-b-PDMA polymer (0.4 g/L) with octadecyl rhodamine-6G (0.12 g/L) in water-ethanol (1:4, v/v) solvent system with continuous removal of organic solvent through dialysis.                   | <b>S27</b> |
| 28 | The size distribution of the octadecyl rhodamine-6G ( $5.0 \times 10^{-5}$ M) in water-ethanol (4:1, v/v) media.                                                                                                    | <b>S28</b> |
| 29 | The size distribution of the PDMA-b-PMMA-b-PDMA polymer (0.4 g/L) with propyl rhodamine-6G ( $5.0 \times 10^{-5}$ M) in water-ethanol (4:1, v/v) media.                                                             | <b>S29</b> |
| 30 | Synthesis and characterization of PDMA-b-PMMA-b-PDMA polymer                                                                                                                                                        |            |

## Experimental

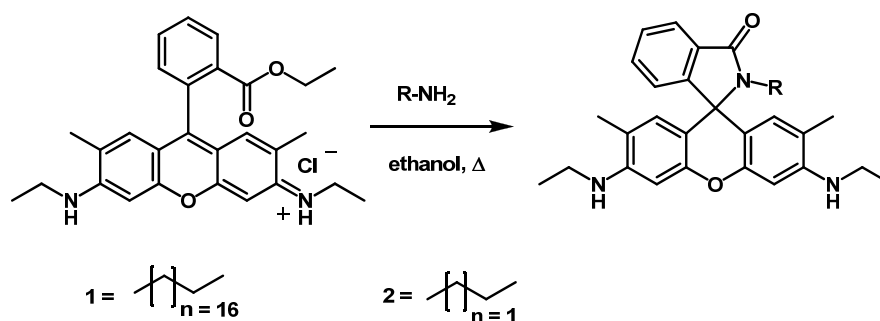

**Scheme S1:** Synthesis of rhodamine-6G derivatives.

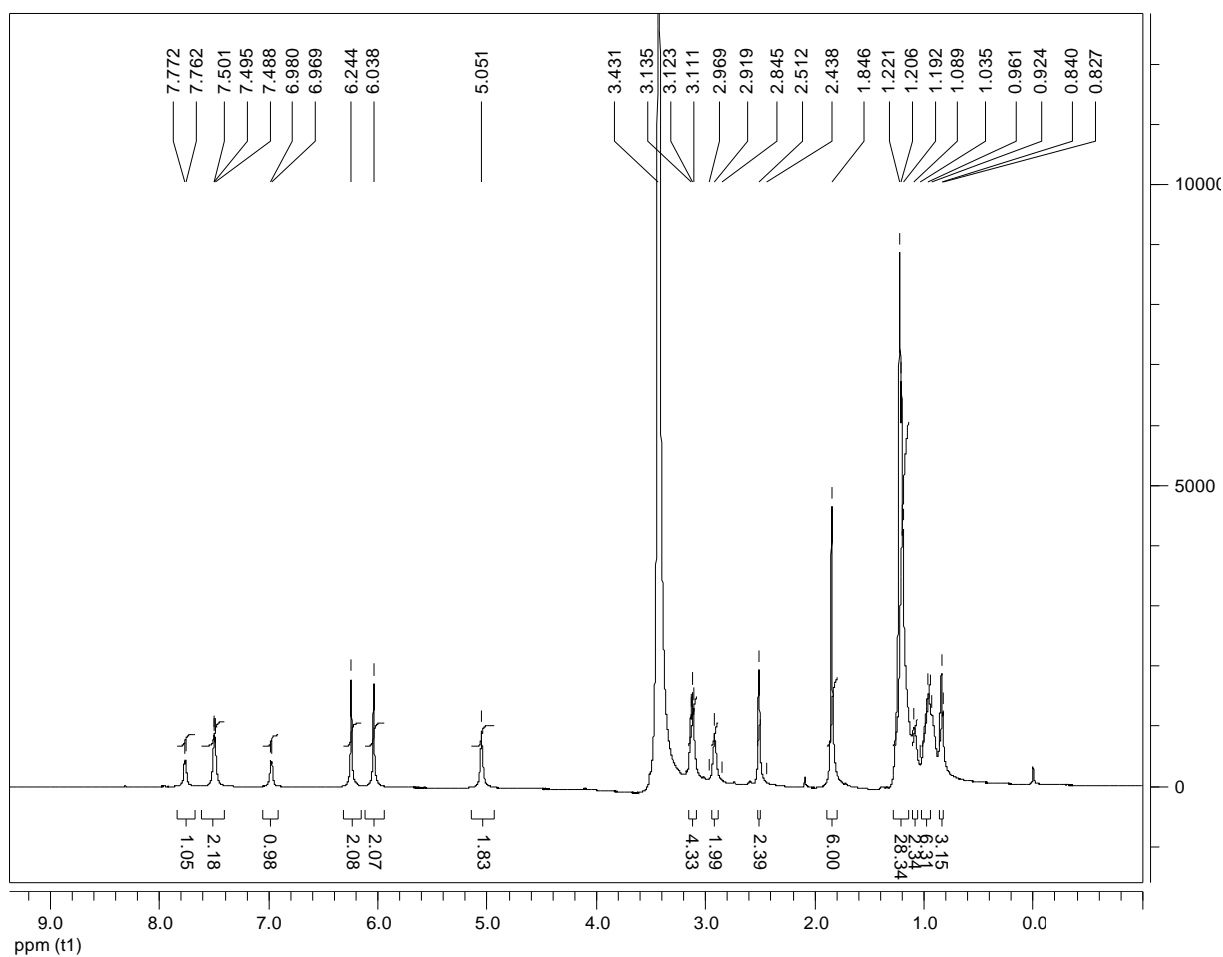

**Figure S2:**  $^1H$  NMR spectrum of octadecyl rhodamine-6G (**R**) in  $d_6$ -DMSO.

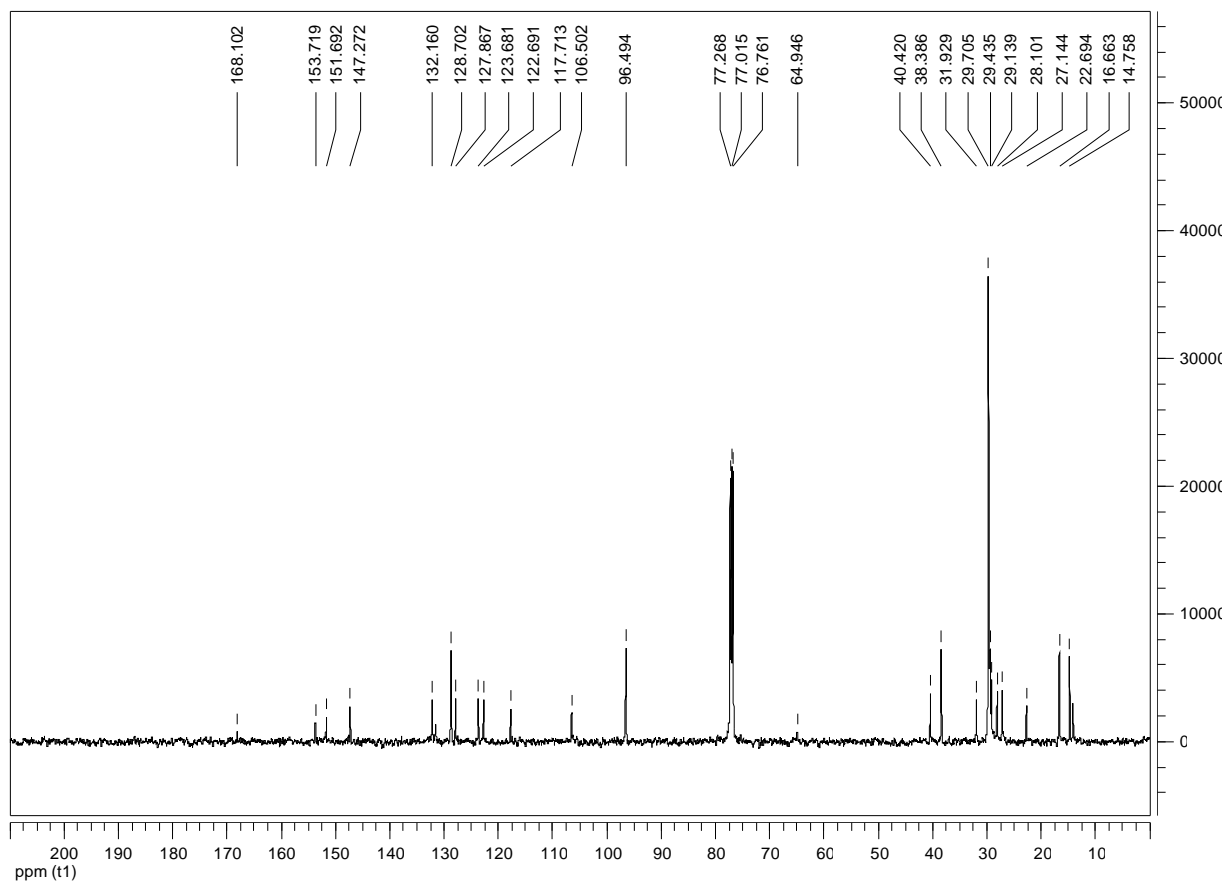

**Figure S3:** <sup>13</sup>C NMR spectrum of octadecyl rhodamine-6G (**R**) in CDCl<sub>3</sub>.

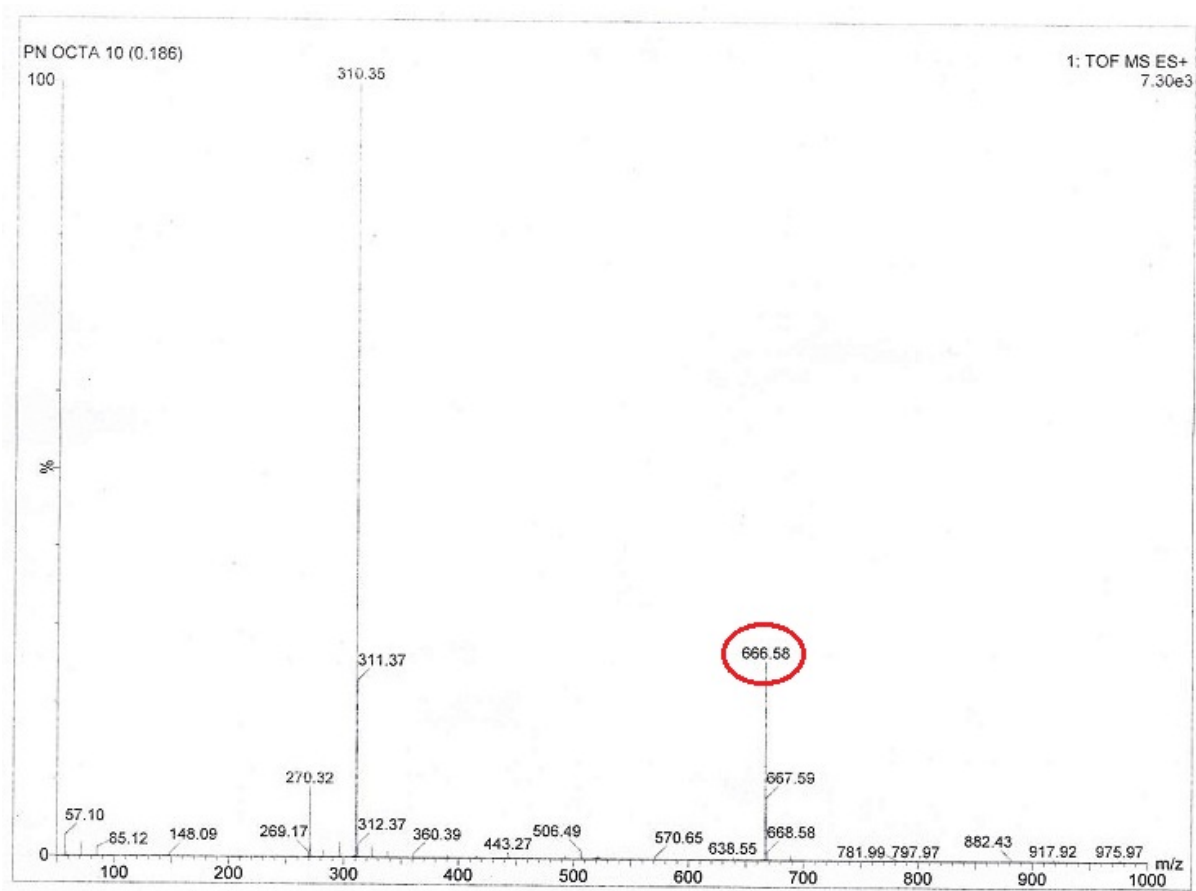

**Figure S4:** Mass spectrum of octadecyl rhodamine-6G (**R**).

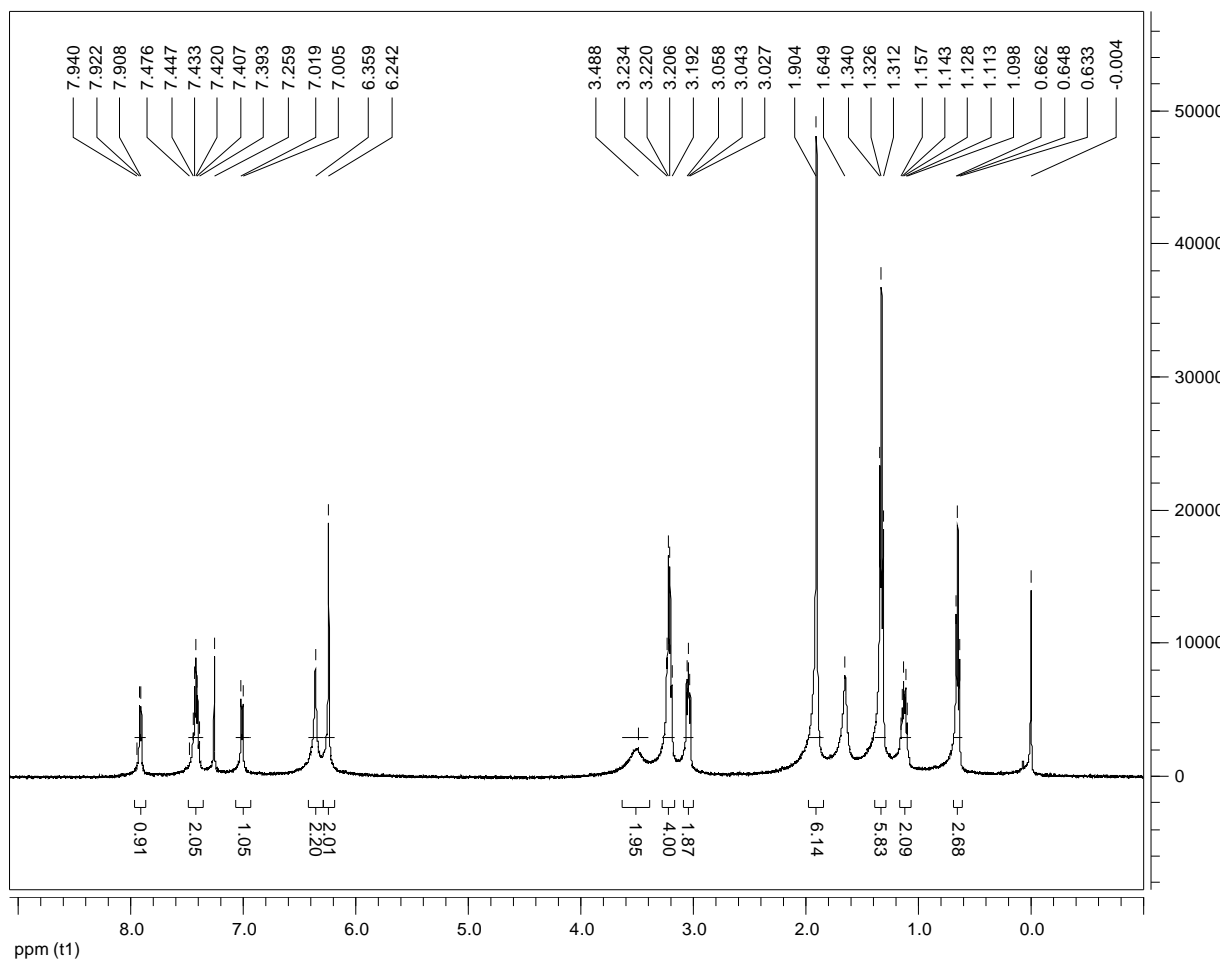

**Figure S5:**  $^1\text{H}$  NMR spectrum of propyl rhodamine-6G ( $\mathbf{R}_1$ ) in  $\text{CDCl}_3$ .

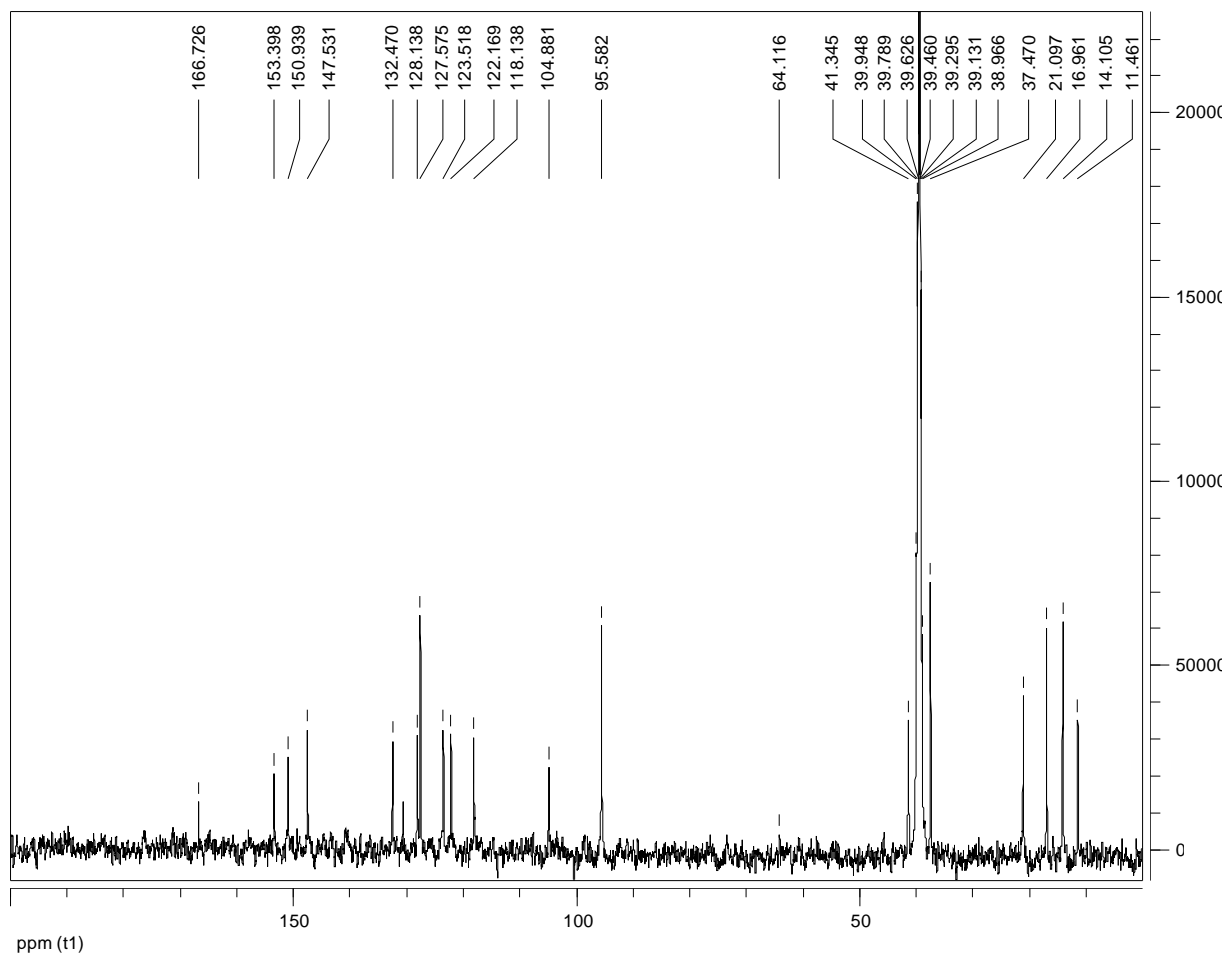

**Figure S6:**  $^{13}\text{C}$  NMR spectrum of propyl rhodamine-6G ( $\mathbf{R}_1$ ) in  $\text{DMSO-d}_6$ .

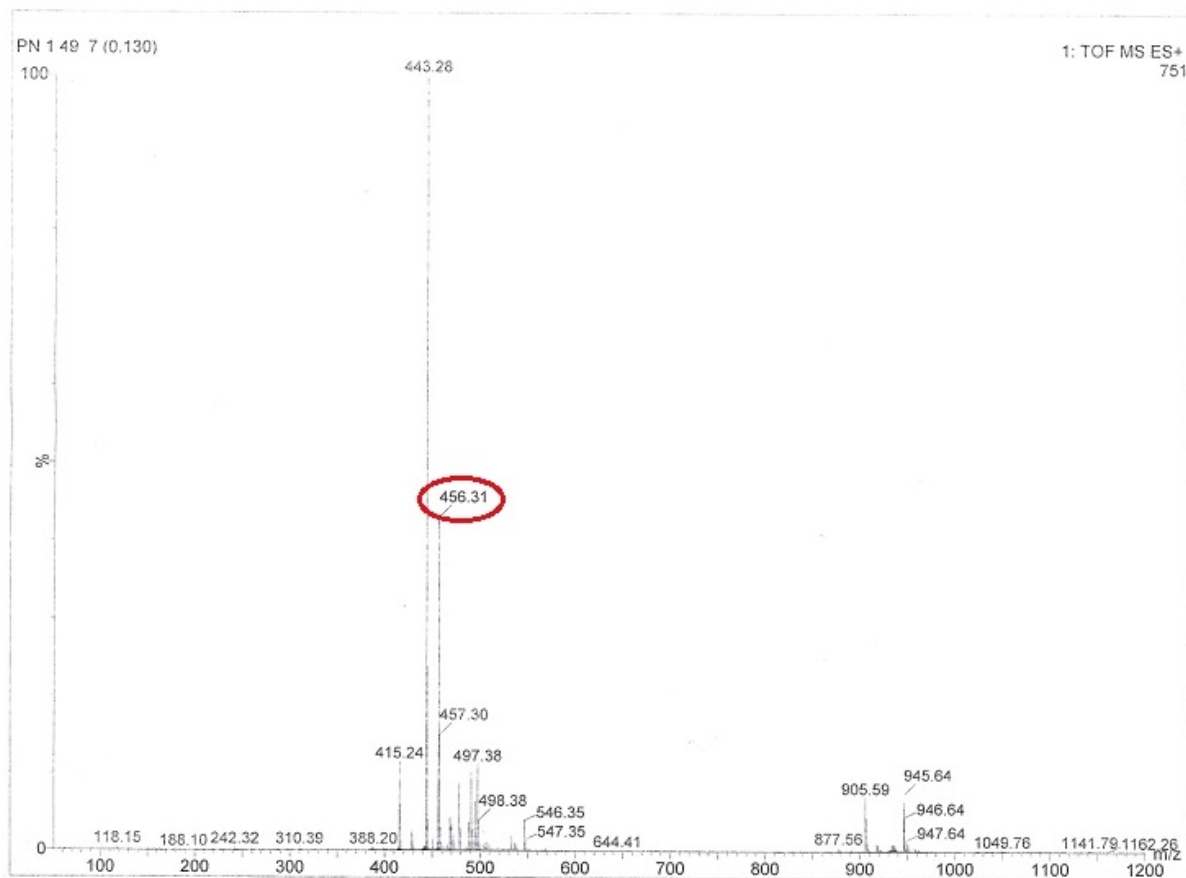

**Figure S7:** Mass spectrum of propyl rhodamine-6G (**R<sub>1</sub>**).



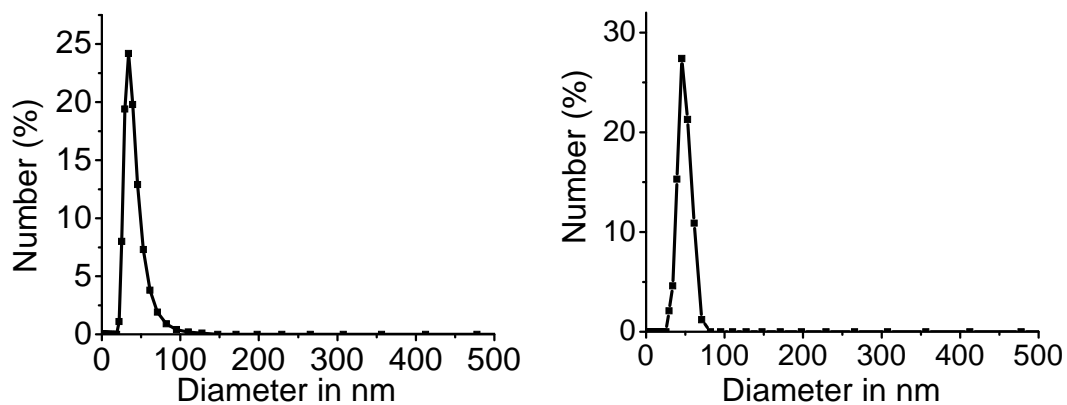

**Figure S8:** DLS result of PDMA-*b*-PMMA-*b*-PDMA polymer in water-ethanol solvent system at a pH = 5 & 7.

**Table S9:** Average hydrodynamic diameter of vesicles at different pH.

| Entry                          | At pH 6 | At pH 7 | At pH 8 |
|--------------------------------|---------|---------|---------|
| Av. hydrodynamic diameter (nm) | 92      | 85      | 55      |

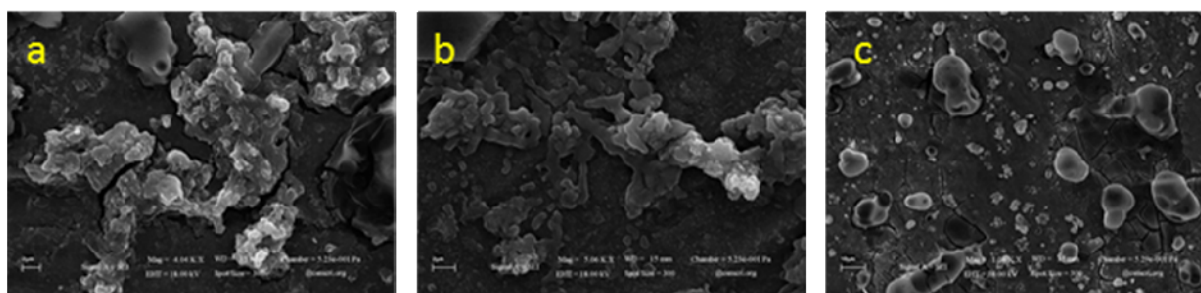

**Figure S10:** SEM picture of vesicles upon exposure to different pH over a period of 24 h; Figure a: pH 3, b: pH 4 and c: pH 5.

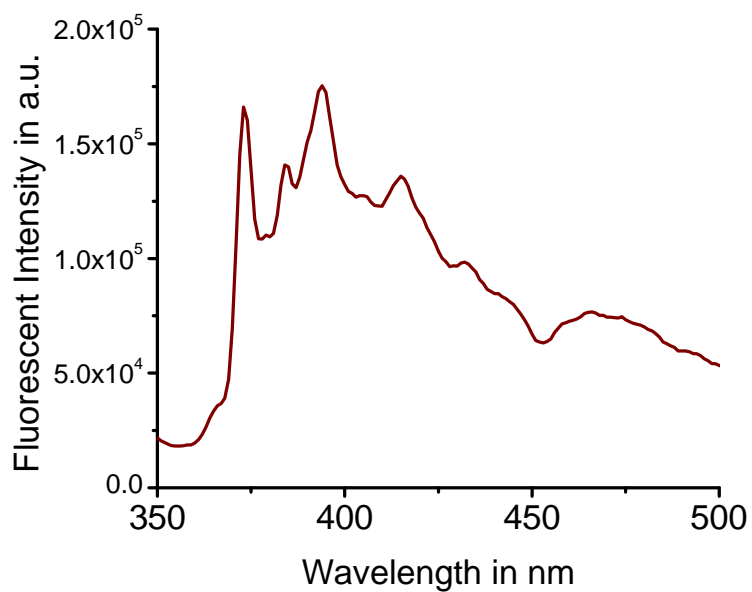

**Figure S11:** Emission spectra of pyrene ( $2.0 \times 10^{-6}$  M) in the vesicle after dialysis.

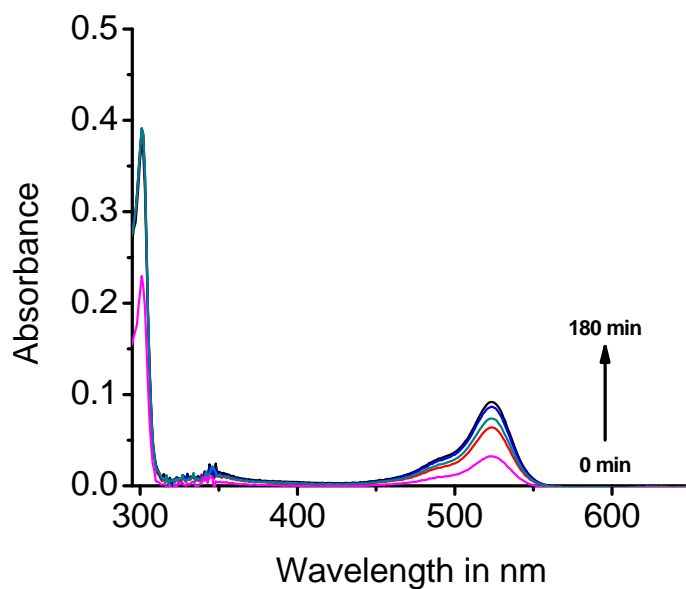

**Figure S12:** UV-Vis response of octadecyl rhodamine-6G ( $8.0 \times 10^{-5}$  M) in aqueous media (ethanol-water, 1:4, v/v) at a pH 6.

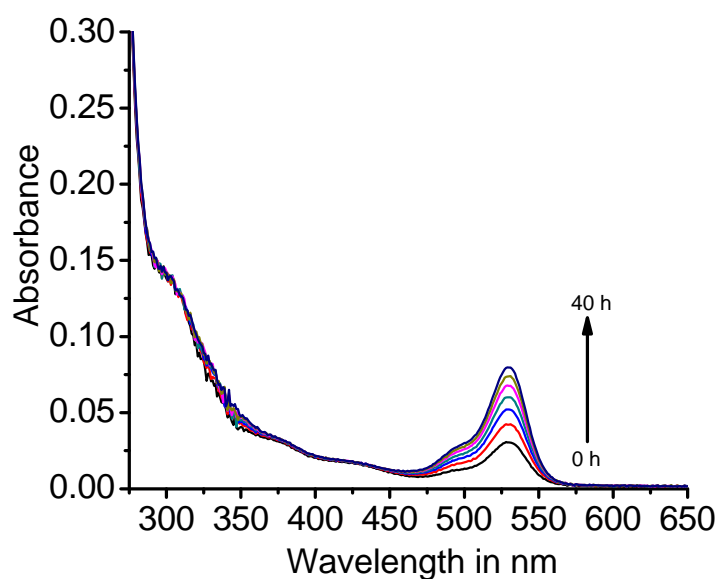

**Figure S13:** UV-Vis response of vesicle in aqueous media (ethanol-water, 1:4, v/v) at a pH 6.

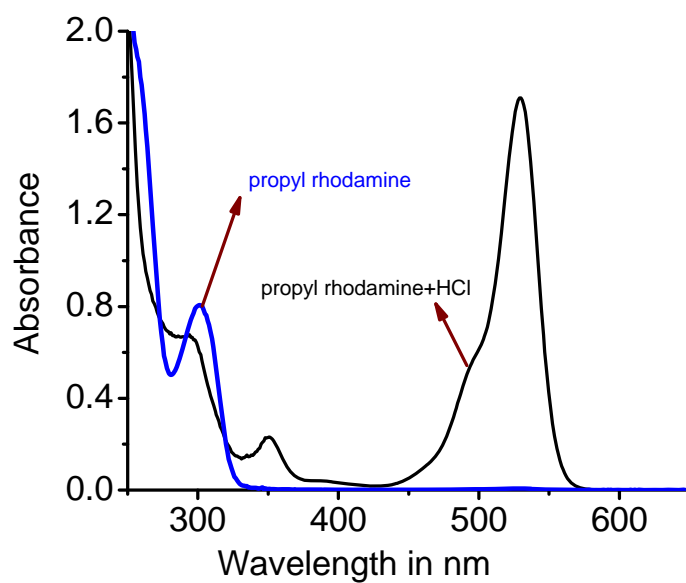

**Figure S14:** UV-Vis spectra of propyl rhodamine-6G ( $5.0 \times 10^{-4}$  M) in ethanol upon addition of 10 equiv of HCl (in water).

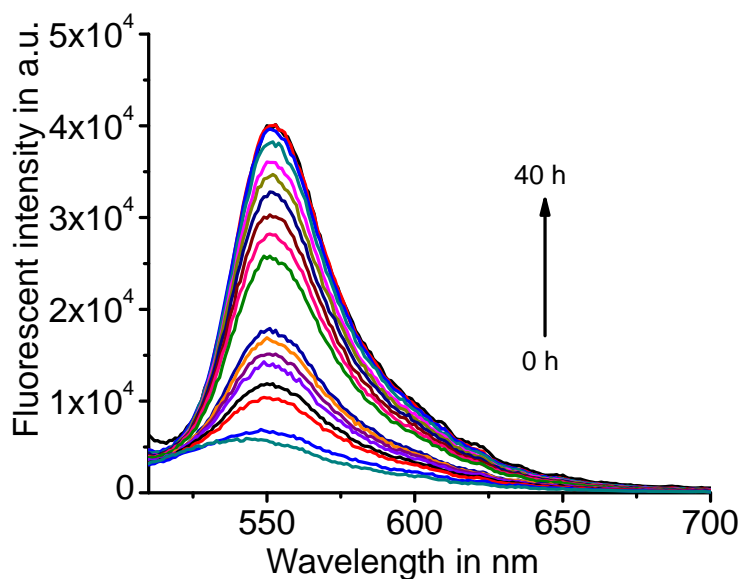

**Figure S15:** Emission spectra of the vesicle solution in aqueous media (ethanol-water, 1:4, v/v) at a pH 6 for a period 40 h.

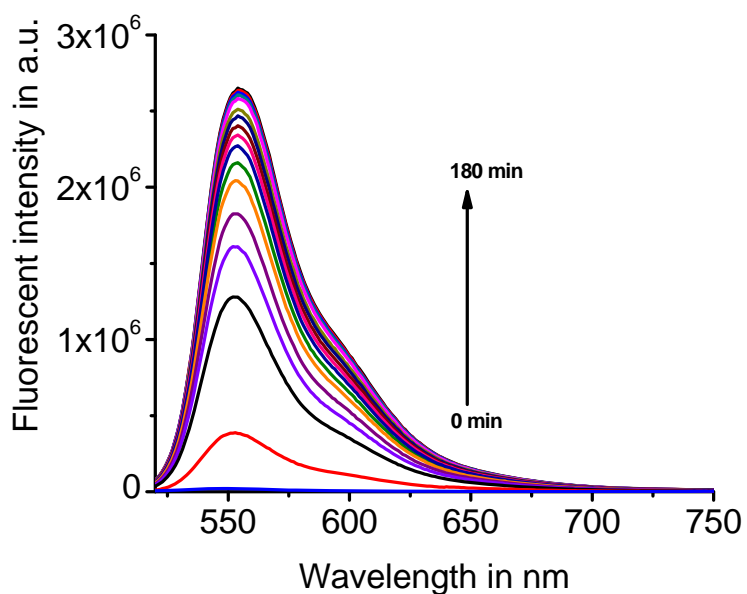

**Figure S16:** Emission response of the octadecyl rhodamine-6G ( $8.0 \times 10^{-5}$  M) in aqueous media (ethanol-water, 1:4, v/v) at a pH 6 for a period 3 h.

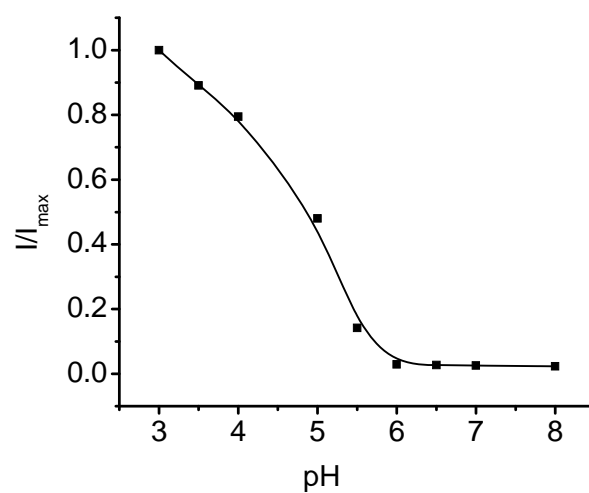

**Figure S17:** Plot of  $I/I_{\max}$  of propyl rhodamine-6G in different pH

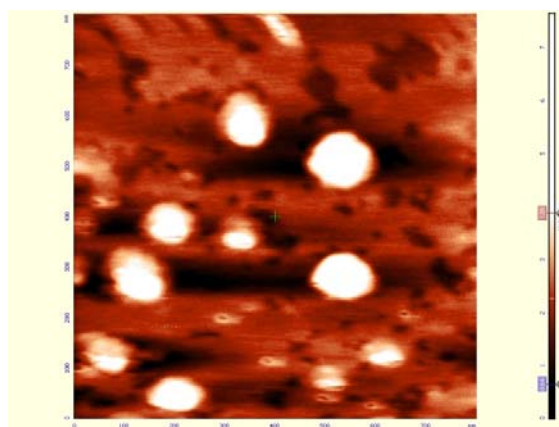

**Figure S18:** AFM image of octadecyl rhodamine-6G (**R**) ( $5.0 \times 10^{-5}$  M) in aqueous media (ethanol-water, 1:4, v/v).

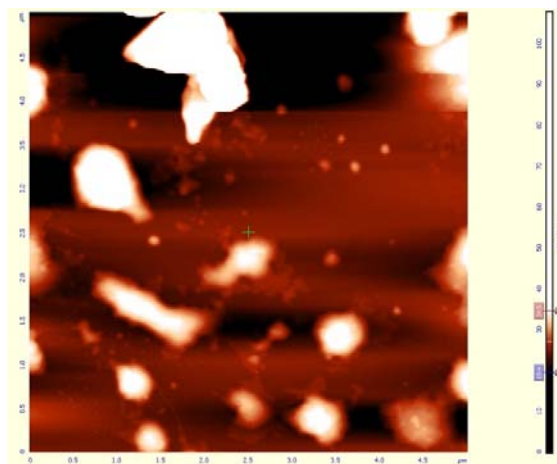

**Figure S19:** AFM image of propyl rhodamine-6G ( $5.0 \times 10^{-5}$  M) in aqueous media (ethanol-water, 1:4, v/v) shows featureless aggregates.

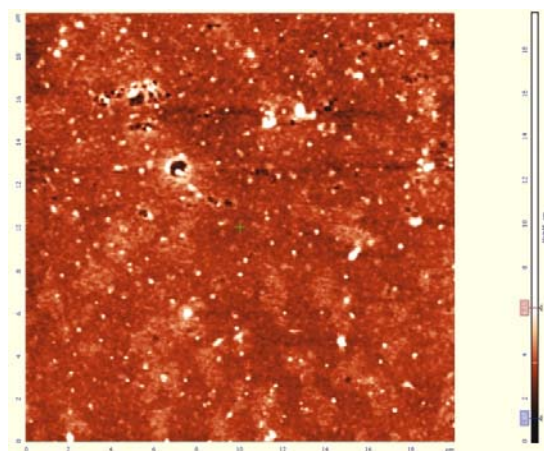

**Figure S20:** AFM image of the PDMA-b-PMMA-b-PDMA polymer (0.4g/L) with propyl rhodamine-6G ( $5.0 \times 10^{-5}$  M) in water-ethanol (4:1, v/v) solvent system.

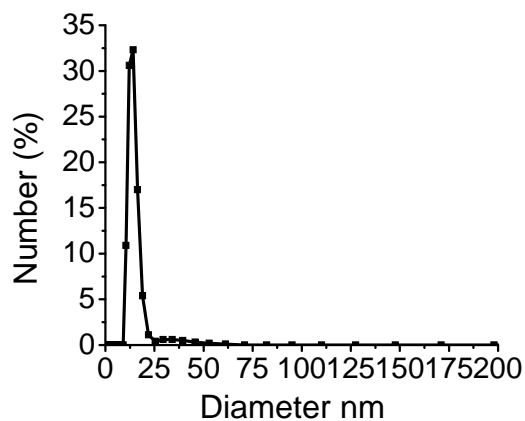

**Figure S21:** DLS result of PDMA-*b*-PMMA-*b*-PDMA polymer (0.4 g/L) with rhodamine-6G (0.12 g/L) in water-ethanol (4:1, v/v) solvent system. Thus, DLS result shows formation of micelles.

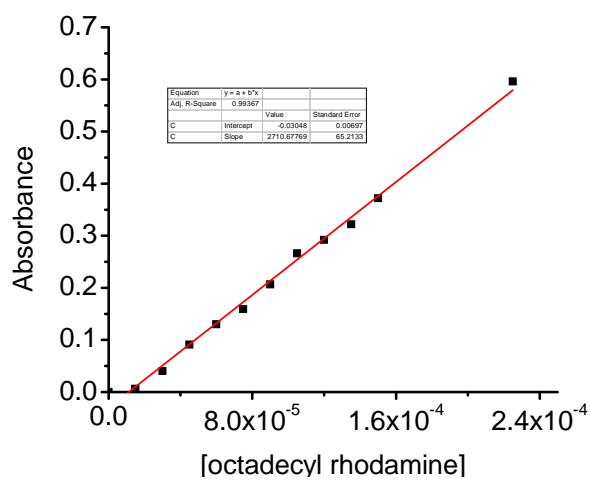

**Figure S22:** Standard curve of octadecyl rhodamine-6G in aqueous media (ethanol-water, 1:4, v/v) system (absorbance).

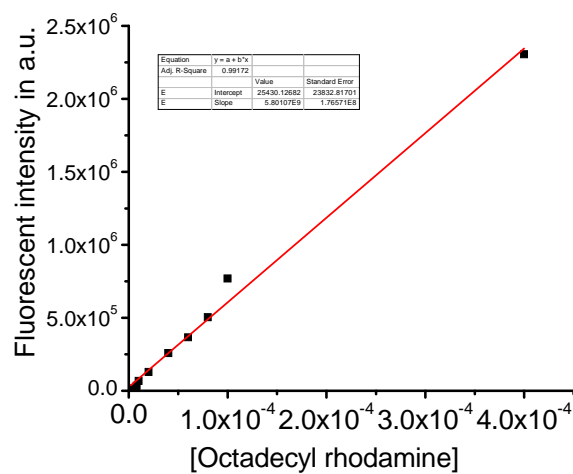

**Figure S23:** Standard curve of release of octadecyl rhodamine-6G in aqueous media (ethanol-water, 1:4, v/v) system at a pH < 2 for 24 h.

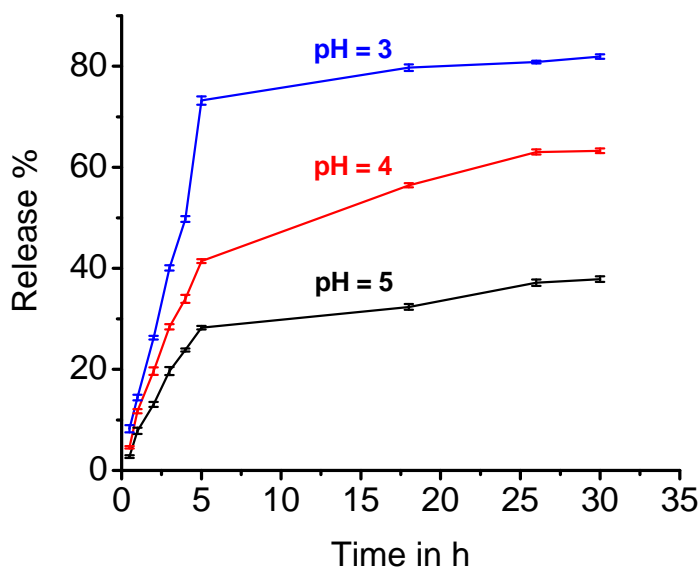

**Figure S24:** Plot for the release of total ring opened octadecyl rhodamine-6G released from the vesicle after dialysis in suitable pH, followed by the addition of 2N HCl for 30 min. in water-ethanol (4:1, v/v) solvent system.



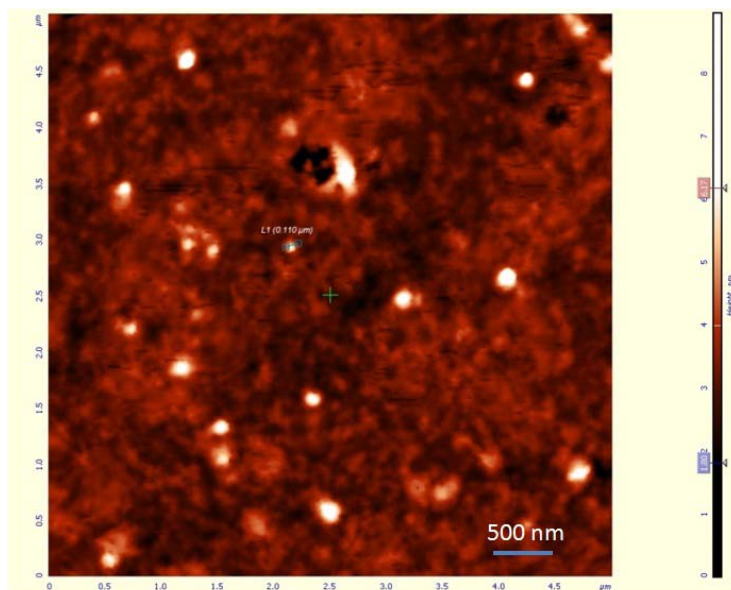

**Figure S25:** AFM image of the PDMA-*b*-PMMA-*b*-PDMA polymer (0.4g/L) with octadecyl rhodamine-6G (0.12 g/L) in water-ethanol (4:1, v/v) solvent system when drop casted over mica substrate.

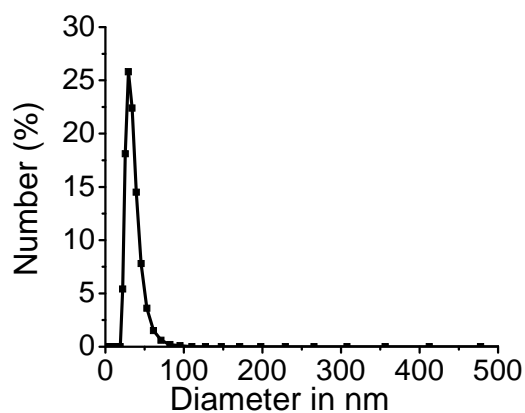

**Figure S 26:** DLS result of PDMA-*b*-PMMA-*b*-PDMA polymer (0.4 g/L) with octadecyl rhodamine-6G (0.12 g/L) in water-ethanol (4:1, v/v) solvent system at a pH = 3. Thus, DLS result shows rapture of the vesicle and generation of micellar structures with an average diameter of > 35 nm at this low pH.

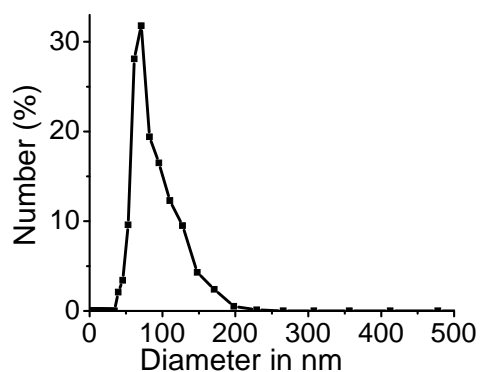

**Figure S27:** DLS result of PDMA-b-PMMA-b-PDMA polymer (0.4 g/L) with octadecyl rhodamine-6G (0.12 g/L) in water-ethanol (1:4, v/v) solvent system at a pH = 7 with continuous removal of organic solvent by dialysis for 24 h.

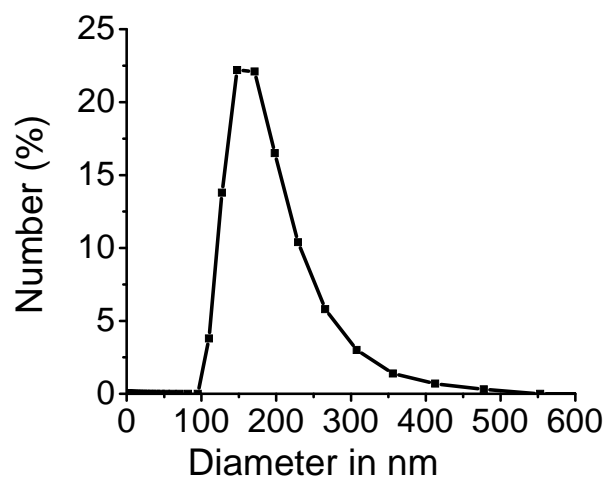

**Figure S 28:** The size distribution of the octadecyl rhodamine-6G ( $5.0 \times 10^{-5}$  M) in water-ethanol (4:1, v/v) media.

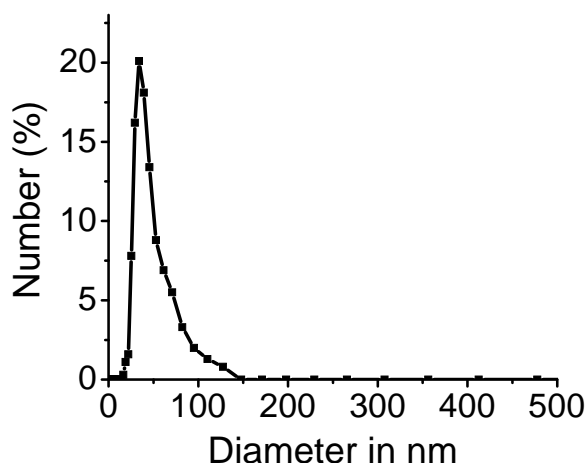

**Figure S 29:** The size distribution of the PDMA-*b*-PMMA-*b*-PDMA polymer (0.4 g/L) with propyl rhodamine-6G ( $5.0 \times 10^{-5}$  M) in water-ethanol (4:1, v/v) media.

#### Synthesis of **PDMA-*b*-PMMA-*b*-PDMA** copolymers.

PDMA<sub>11k</sub>-PMMA<sub>6k</sub>-PDMA<sub>11k</sub> (subscripts indicate the  $M_n$ ) copolymer was synthesized by the reported procedure.<sup>1</sup> A typical example for the synthesis of PDMA<sub>11k</sub>-PMMA<sub>6k</sub>-PDMA<sub>11k</sub> copolymer with  $M_n$  28000 g/mol and a polydispersity index (PDI) 1.20 is as follows. Briefly, a difunctional Cl-PMMA-Cl was prepared at 35 °C using CuCl/bpy as the catalyst and 1,2-bis(bromoisobutyryloxy)ethane as the initiator with the following recipe: MMA (7 g, 0.07 mol), acetone (4.2 mL), CuCl (0.1 g, 0.00094 mol), bpy (0.3 g, 0.0019 mol) and 1,2-bis(bromoisobutyryloxy)ethane (0.34 g, 0.00094 mol). After 12 h the conversion was 80% and the  $M_n$  and PDI values were 6300 g/mol and 1.30 respectively. In the next step the dried and purified Cl-PMMA-Cl macroinitiator was used to polymerize DMA. The recipe was as follows: DMA (4.66 g, 0.03 mol), acetone (4.2 mL), CuCl (0.016 g, 0.00016 mol), bpy (0.05 g, 0.00032 mol) and Cl-PMMA-Cl (1.1 g, 0.00017 mol) ( $M_n$ = 6300 and PDI = 1.30). After 12 h, the conversion was 78%. The polymer was purified by passing its solution through a silica gel column using toluene as an eluent. The copper free solution was concentrated by rotary evaporator and precipitated in petroleum ether. The polymer was re-dissolved in acetone and re-precipitated with petroleum ether again. The precipitated mass was dried in air for 12 h and then in vacuum oven at 60 °C for 48 h. The  $M_n$  and PDI values were determined to be 28,400 g/mol and 1.2 respectively.

The  $M_n$ s and PDIs of the copolymer were determined by GPC. The GPC was performed at room-temperature using a Waters model 2695 separation module coupled with Waters 2414 refractive index detector and Waters Ultra-Styrigel columns of 10000, 1000, 500 Å pore size which were preceded by a prefilter. HPLC grade THF was used as the eluent at a flow rate of 1 mL/min. Before injection into the GPC system the polymer solutions were filtered through a pre-filter-filter combination system compatible with organic solvents. Polystyrene standards were used for calibration.

### Quantum Yield calculation

Fluorescence quantum yield of **R**, **R<sub>1</sub>** and **R<sub>v</sub>** was determined in Ethanol-H<sub>2</sub>O (1:4, v/v) using optically matching solutions of Rhodamine-6G ( $\Phi_F = 0.94$  in ethanol)<sup>2</sup> as standard at an excitation wavelength of 500 nm and quantum yield was calculated using equation 1.

$$\Phi_F = \Phi_r (A_r F_s / A_s F_r) (\eta_s^2 / \eta_r^2) \text{ ----- 1}$$

where  $A_s$  and  $A_r$  are the absorbances of the sample and reference solutions respectively at the same excitation wavelength,  $F_s$  and  $F_r$  are the corresponding relative integrated fluorescence intensities and  $\eta$  is the refractive index of the solvent used.

1. U. Chatterjee, S. K. Jewrajka and B. M. Mandal, *Polymer.*, 2005, **46**, 10699.
2. (a) M. Fischer and J. George, *Chem. Phys. Lett.*, 1996, **260**, 115; (b) D. Wu, W. Huang, Z. Lin, C. Duan, C. He, S. Wu and D. Wang, *Inorg. Chem.*, 2008, **47**, 7190.
